# Supplementary material for: Fabrication of Polymeric Microparticles by Electrospray: The Impact of Experimental Parameters
Source: PubMed Central journal article supplement (PMC7151563; doi:10.3390/jfb11010004), 2020-01-15
Supplement: jfb-11-00004-s001.pdf [file jfb-11-00004-s001.pdf]

# Fabrication of Polymeric Microparticles by Electrospray: The Impact of Experimental Parameters

Alan Í. S. Morais <sup>1</sup>, Ewerton G. Vieira <sup>1</sup>, Samson Afewerki <sup>2,3</sup>, Ricardo B. Sousa <sup>4</sup>, Luzia M. C. Honorio <sup>1</sup>, Anallyne N. C. O. Cambrussi <sup>1</sup>, Jailson A. Santos <sup>1</sup>, Roosevelt D. S. Bezerra <sup>5</sup>, Josy A. O. Furtini <sup>1</sup>, Edson C. Silva-Filho <sup>1</sup>, Thomas J. Webster <sup>6</sup> and Anderson O. Lobo <sup>1,\*</sup>

<sup>1</sup> LIMAV—Interdisciplinary Advanced Materials Laboratory, PPGCM—Materials Science and Engineering Graduate Program, UFPI—Federal University of Piauí, Teresina 64049-550, Brazil; alanicar@gmail.com (A.Í.S.M.); ewertonvieira@ufpi.edu.br (E.G.V.); luzia\_quimica@yahoo.com.br (L.M.C.H.); anallynecambrussi@gmail.com (A.N.C.O.C.); j.santospi@hotmail.com (J.A.S.); josy\_osajima@yahoo.com.br (J.A.O.F.); edsonfilho@ufpi.edu.br (E.C.S.F.)

<sup>2</sup> Division of Engineering in Medicine, Department of Medicine, Harvard Medical School, Brigham & Women's Hospital, Cambridge, MA 02139, USA; samsom.afewerki@gmail.com

<sup>3</sup> Harvard-MIT Division of Health Science and Technology, Massachusetts Institute of Technology, MIT, Cambridge, MA 02139, USA

<sup>4</sup> Federal Institute of Education, Science and Technology of Tocantins, Dianópolis Campus, IFTO, Dianópolis 77300-000, Tocantins, Brazil; ricardo.sousa@ifto.edu.br

<sup>5</sup> Federal Institute of Education, Science and Technology of Piauí, Teresina-Central Campus, IFPI, Teresina 64000-040, Brazil; rooseveltdsb@ifpi.edu.br

<sup>6</sup> Department of Chemical Engineering, Northeastern University, Boston, MA 02115, USA; th.webster@northeastern.edu

\* Correspondence: lobo@ufpi.edu.br; Tel.: +55 86 3237-1057

**Table S1.** Summary, type of electrospray methodology and specification of parameters used.

| Methodology                            | System Parameters                                                                                                                                                                                                               | Reference |
|----------------------------------------|---------------------------------------------------------------------------------------------------------------------------------------------------------------------------------------------------------------------------------|-----------|
| EHDA                                   | Chamber; D = 55 mm, 70 mm, 110 mm; ID = 0.39 mm; OD = 0.72 mm.                                                                                                                                                                  | [1]       |
| CES                                    | Tubing: DI = 2mm e DE = 3mm; CFR = variation 0.20 a 1,00 mL/h; OD = 0.72 mm; SFR = variation de 4.0 e 5.0 mL/h; V = variation 8.0 a 15 kV.                                                                                      | [2]       |
| ES                                     | GS; V = 18 kV e 20 kV; D = 30 cm; CB = solution of CaCl <sub>2</sub> ; FR = 1 mL/h; NG = 20 (ID = 0,9 mm). Negative electrode attached to needle.                                                                               | [3]       |
| Multi-ES                               | The volume fraction of polymer varied with or without rhodamine; OD = 210 µm or 500 µm; M: stainless steel; OBS: Electrospray multiplexed, uses a micro-fabricated MES device consisting of a silicon nozzle chip and a puller. | [4]       |
| ES with mobile mask.                   | FR = 0.5 mL/h; NG = 24; PS = 5 mL.                                                                                                                                                                                              | [5]       |
| ES                                     | The polymer concentration, the voltage, the collection distance and the feed rate were adjusted in different parameters; RH = 32%; T = 22 °C.                                                                                   | [6]       |
| ES                                     | Chamber; D = 15 cm; Teflon capillary; ID = 0,6 mm; FR = 5 mL/h; M – Metal; SP; Syringe = 2.5 mL; T = 20°C or 40°C; TC = Aluminum plate; V = 30 kV.                                                                              | [7]       |
| ES is assisted by floating electrodes. | D = 15 cm; FR – 0.5 mL/h; M: metallic; TC - interdigitated microelectrodes; V- Direct current (DC) 20 kV.                                                                                                                       | [8]       |

|             |                                                                                                                                                                                                                                             |      |
|-------------|---------------------------------------------------------------------------------------------------------------------------------------------------------------------------------------------------------------------------------------------|------|
| ES          | C = 7 cm; FR = 0.1 e 0.3 mL/h; M: stainless steel; NG: 20 (908 $\mu$ m OD, 603 $\mu$ m ID); SP; T = stainless steel ground plate (7.6 x 7.6 cm <sup>2</sup> ); V = 4.5 kV.                                                                  | [9]  |
| ES          | FR = 0.50 mL/h; ID = 0.55 mm; M: stainless steel; OD = 0.80 mm; PC = different proportions % w/V; SP; Silicone Tube; V = 15 kV;                                                                                                             | [10] |
| ES          | D = 30 cm; CB = Solution of CaCl <sub>2</sub> ; FR = 1 mL/h; GS; NG - 20 (ID 0,9 mm); V = 18 kV.                                                                                                                                            | [11] |
| ES          | Chamber; FR = variation 40 a 200 $\mu$ L/h; M: stainless steel; OD - 210 $\mu$ m ou 500 $\mu$ m; The distance between the ring electrode (charged at 10 kV) and the collector was fixed at 12 cm with extractor, ring electrode and corona. | [12] |
| ES          | D = 15 ou 25 cm; FR - 0,5 mL/h a 3 mL/h; GS 1 mL; MC: stainless steel; NG - 26 a 21 G; RH - 34% to 49%; SP; T - 23 to 24 °C; TC- standard aluminum sheets (20 x 20 cm <sup>2</sup> ) washed with 70% ethanol; V = 10 kV.                    | [13] |
| ES          | D = 20 cm; FR = 0.2 e 4 mL.h <sup>-1</sup> ; steel needle with inner diameter of ID - 0.2, 0.5, 1 or 1.7 mm; PS; SP; V = 15 a 25 kV                                                                                                         | [14] |
| CES         | Coaxial needle; D = 10 cm; CB = double distilled water (dd-H <sub>2</sub> O) or ammonium acetate buffer; CFR = 0.48 mL/h; CR; ID = 210 $\mu$ m e OD = 600 $\mu$ m; M: stainless steel; PS; SFR = 2.8 mL/h; V = 3 a 4 kV.                    | [15] |
| CES         | V = 23 kV; Coaxial Needle; IN: ID = 330 e OD = 630 $\mu$ m; CFR = 1.0; SFR = 0.5 ml/h; EN: ID = 1.0 e OD = 2.5 $\mu$ m; D = 5.5 cm.                                                                                                         | [16] |
| ES          | D = 100 mm; FR = 900 $\mu$ L/h; ID = 0.88 mm; OD = 1.27 mm; PC = variation 1% a 4% (w/v); SP; TC = aluminum foil; V = + 15 kV; Perpendicular - horizontal                                                                                   | [17] |
| ES          | D = 100 mm; FR = 600 to 1500 $\mu$ L/h; SP; T = environment; TC = aluminum foil; V = +10 kV                                                                                                                                                 | [18] |
| ES          | D = 25 cm; FR = 1.0 mL/h; ID = 0.25 mm; PS; RH = 50 $\pm$ 5%; 5 mL syringe; T = 25 $\pm$ 2 °C; TC = aluminum plate; V = 16 kV.                                                                                                              | [19] |
| CES         | Epoxy coated concentric spray head (EP); D = 20 cm.; CFR = 0.4, 0.7 e 1,0 mL/h; horizontal Two SP; RH = 52% $\pm$ 6%; SFR = 1.0 mL/h; T = 22 °C $\pm$ 3°C; TC = metal wrapped by aluminum foil; V = 20 kV.                                  | [20] |
| ES          | D = 10 cm; CB = aqueous solution of sodium tripolyphosphate (TPP) as a coagulant, 400 rpm stirring; FR = 5 mL/h; NG = 26 G; V = 23 kV.                                                                                                      | [21] |
| ES ring     | 52 variations of conditions involving solvent, flow rate, collector distance and Needle Gauge (G); CR - located 6 mm above the tip of the needle; Syringe to Needle Solution Hose; RH = 40%; SP; Syringe de 5 mL; T = 25 °C.                | [22] |
| ES          | D = Distance nozzle and manifold - adjustable; ID = 0.4 mm; MC = stainless steel; Syringe de 5 ml; TC = aluminum foil; V = 5 kV; horizontal.                                                                                                | [23] |
| ES portátil | D = 6 cm; CB = CaCl <sub>2</sub> 0.102 M grounded; FR = 2 mL/h; PC = Alginate 2% (w/V); D = 20 cm; FR = 0.6 mL/h; PC = PLGA 2.5% (w/V); TC = Flat stainless steel catcher covered with aluminum foil.                                       | [24] |
| ES          | D = 15 cm; FR = 0.8 mL/h; SP; TC = standard aluminum sheets (15 x 15 cm <sup>2</sup> ) washed with 70% ethanol; V = 10 kV. (horizontal)                                                                                                     | [25] |
| ES          | D = 13 cm; CB = EtOH/PVA e EtOH, MeOH EtOH/OA, EtOH/DiW (50/50) EtOH/PS80, DiW (5, 22, 40°C); FR = 0.5 mL/h; NG - 23G (OD = 0.64 mm); V = 11 kV                                                                                             | [26] |

|                                            |                                                                                                                                                                                                                                                                                                                                        |      |
|--------------------------------------------|----------------------------------------------------------------------------------------------------------------------------------------------------------------------------------------------------------------------------------------------------------------------------------------------------------------------------------------|------|
| ES and CES                                 | 5 mL glass syringe; 20G blunt point needle (The needle has the following dimensions: 51 mm length, 0.91 mm OD, and 0.60 mm ID); stainless steel (SS) collection plate; D = 10 cm; Collector - V = -2 kV; Needle - V = +10 and 11 kV; Outer Phase – FR = 0.85 mL/hr; Inner Phase - FR = 0.02 mL/hr;                                     | [27] |
| CES                                        | D = 17 cm; CFR = 0.3, 0.5 mL/h; PC = Nuclear layer (3%, 4%, 5%); RH = 30 ± 5 %, no rapid flow of air; SFR = 1 mL/h; T = 25 ± 5°C; V = 11.06 kV                                                                                                                                                                                         | [28] |
| CES with flow and air on the outer needle. | Coaxial Needle; Internal needle – NG -17 G; External needle - NG = 12 G; D = 20 cm; FR = 0.05 e 0.1 mL/min; Air pressure at 28 psi; SP; TC = Copper sheet; Substrate of porous carbon nanofibers.; Aluminum foil; V = 20 kV.                                                                                                           | [29] |
| ES                                         | syringe (1 mL); 1 mL h <sup>-1</sup> ; 20 kV; 0.62 mm inner diameter flat-ended metallic needle; D = 15 cm; RH 50% and 25°C                                                                                                                                                                                                            | [30] |
| CES                                        | D = 10 cm; PC = 4% w/v PLGA; FR = 12 µL/min; twin syringe pump; two high voltage DC power supplies; Positive voltage V = 10 kV, and negative voltage V = 8 kV. The TC = aluminum plate; The coaxial needle consists of an IN (ID = 0.26 mm; OD = 0.51 mm) and an ON (ID = 0.84 mm; OD = 1.27 mm);                                      | [31] |
| CES                                        | D = 5.0 cm; EN: ID e OD = 1.0 e 2.5 mm; IN: ID e OD = 330 e 630 µm, respectively; FR = 0.2 mL/h; SP; TC = Stainless steel dish containing disodium hydrogen phosphate solution; V = 23 kV.                                                                                                                                             | [32] |
| CES                                        | D = 5.0 cm; EN: ID e OD = 1.0 e 2.5 mm; IN: ID e OD = 330 e 630 µm, respectively; FR = 0.2 mL/h; SP; TC = Stainless steel dish containing disodium hydrogen phosphate solution; V = 23 kV.                                                                                                                                             | [32] |
| CES                                        | D = 5.0 cm; CFR e SFR = 0.2 mL/h; EN: ID = 1.0 mm; IN: ID = 140, 270 e 400 µm; TC = Stainless steel dish containing disodium hydrogen phosphate solution; V = 23 kV.                                                                                                                                                                   | [33] |
| ES                                         | D = 10 cm; FR = 0.7 e 1.4 mL/h; OD = 1.2 mm; PC = solutions of 5% by weight and 10% by weight of PVP/water; PS = plastic 20 mL inkjet syringe quarter-inch silicone tubing; SP; T = entre 21 e 24°C; TC = plate; V = 19, 22.7, 21 e 27 KV; WR = 1 cm diameter approximately 1 mm above the nozzle tip.                                 | [34] |
| TES                                        | Metallic ground ring electrode (diameter ~5 cm) located 5 cm below; MC – Stainless steel; EN: OD = 1.60 and ID = 1.07; IN: OD = 2.85 and ID = 2.26; CN: OD = 0.50 and ID = 0.31; Syringes connected to silicone tubes; SP = 3 units; V = 10 kV; FR = 10, 2.5 e 1.6 mL/h for the outer, middle and inner layers; PC = 10 % (w/v) de PCL | [35] |
| CES                                        | D = 10 cm; GS; SFR = 0.5 mL/h; SP; V = +2.5 KV (needle); V = -8.0 KV (collector)                                                                                                                                                                                                                                                       | [36] |
| ES ring                                    | liquid bath phase = 1 wt %, 2.5 wt %, 5 wt %, 7.5 wt %, or 10 wt % calcium chloride dihydrate; V = 5 kV; metallic ring; FR = 0,1 mL h <sup>-1</sup> ; borosilicate glass capillary (1 mm OD e 0,25 mm ID) at the tip coupled a micropipette puller com diameter of 50 µm (±5 µm)                                                       | [37] |
| ES                                         | PC = 1 wt%, 3 wt%, 5 wt%, 10 wt%, 14 wt%, 15 wt%, 16 wt%, 17 wt%, and 18 wt%; MW = 14.8 kg/mol, 24.2 kg/mol, 52.7 kg/mol and 125.6 kg/mol; FR = 0.6 mL/h, 9 mL/h; V = 11 kV, 13 kV and 15 kV.                                                                                                                                          | [38] |
| ES                                         | PC = chitosan/PEG proportions (wt/wt) (90/10, 80/20, 70/30, 60/40); collector cylinder of 785 cm <sup>2</sup> covered by aluminum foil; drum rotation of 140 rpm, wash speed of 20 mm s <sup>-1</sup> ;FR = 6 ml h <sup>-1</sup> ; scan speed of 40 mm s <sup>-1</sup> under 25 kV voltage and 8 cm of needle-collector distance.      | [39] |

|            |                                                                                                                                                                                                                                                                                                                                                                                                            |      |
|------------|------------------------------------------------------------------------------------------------------------------------------------------------------------------------------------------------------------------------------------------------------------------------------------------------------------------------------------------------------------------------------------------------------------|------|
| ES         | V = 8 kV, nozzle: ID = 500 $\mu$ m, D = 8 cm; CB= 2% (w/v) CaCl <sub>2</sub> was prepared in distilled water; header tank height = 20 cm                                                                                                                                                                                                                                                                   | [40] |
| ES and CES | Eudragit solutions of 1.0% w/w and 2.0% w/w; 10 ml airtight syringes; needles of inner diameter 0.6 mm and 1.52 mm and outer diameter of 0.9 mm and 2.03 mm, respectively; Collector distance 250 mm; 6 $\mu$ l min <sup>-1</sup> and 12 $\mu$ l min <sup>-1</sup> for the inner and outer solution, respectively; 14 kV a 19 kV; room temperature 21 $\pm$ 1 $^{\circ}$ C and relative humidity of 40–60% | [41] |
| ES         | PC= (2%–8% w/v); FR = (0.1–1 ml/hr); V = (10–20 kV); D = (5–15 cm); plastic syringe needle with a diameter of 0.8 mm; C =aluminum plate of 10 cm $\times$ 10 cm                                                                                                                                                                                                                                            | [42] |

Siglas: The electrohydrodynamic atomization = EHDA; Electropray = ES; Electropray Coaxial = CES; Electropray tri-coaxial = TE; Polymer concentration = PC; Molecular weight = MW; Flow Rate = FR; core flow rate = CFR; shell flow rate = SFR; voltage = V; solvent type = ST; needle gauge = NG; collecting distance = D, collecting bath = CB; Internal diameter of the needle or capillary = ID; Outer diameter of needle or capillary = OD; External needle = EN, Internal needle = IN, Central needle = CN, Temperature = T, Relative humidity = RH; Distance from needle tip to ring = DNR, Wire Ring = WR; Copper ring = CR, Syringe pump = SP; Plastic syringe = PS; Glass syringe = GS; Type of collector = TC; Material collector = MC; Ethanol = EtOH; poly(vinyl alcohol) = PVA; Methanol = MeOH; Distilled water = DiW; oleic acid = OA; polysorbate 80 = PS80;

**Table 2.** Solvents and polymers used.

| Polymer                                                                                                                                        | Solvent and surfactant                                                                                           | Reference |
|------------------------------------------------------------------------------------------------------------------------------------------------|------------------------------------------------------------------------------------------------------------------|-----------|
| Poly lactide glycolide (PLGA), ethyl acetate copolymer (EVAC) and polycaprolactone (PCL) were used to make particles.                          | Dichloromethane (DCM) and acetonitrile (ACN) were used as organic solvent.                                       | [1]       |
| Poly(DL-lactide-co-glycolide) (PLGA 75:25, Mw = 90,000–126,000)                                                                                | Acetonitrile                                                                                                     | [2]       |
| Sodium alginate powder (medium viscosity 20–4000 cps, low viscosity 250 cps)                                                                   | Water                                                                                                            | [3]       |
| Poly(lactic-co-glycolic acid) (PLGA) (40 000–75 000 molecular weight, lactide/glycolide = 50:50, Sigma–Aldrich); pluronic F127 (Sigma–Aldrich) | dichloromethane (DCM) (Fisher Chemical, Waltham, MA); N,N-dimethylformamide (DMF) (Fisher Chemical, Waltham, MA) | [5]       |
| PLGA (IV 0.55–0.75, Mw = 53.8 kDa, Lactel Absorbable Polymers, Durect Corporation)                                                             | 2,2,2-trifluoroethanol (TFE, Reagent Plus grade, purity $\geq$ 99%, Sigma–Aldrich)                               | [4]       |
| Poly(methyl methacrylate) (PMMA, Mw = 110,000 g mol <sup>-1</sup> )                                                                            | N,N-dimethylformamide (DMF)                                                                                      | [6]       |
| Pluronic F127 (PL).                                                                                                                            | 1-propanol                                                                                                       | [7]       |
| Polycaprolactone (PCL) (Sigma-Aldrich, Mn = 60 000)                                                                                            | Acetone                                                                                                          | [8]       |
| Poly(vinyl alcohol) (PVA); polymer acetalated dextran (Ac-DEX)                                                                                 | Dichloromethane (DCM)                                                                                            | [9]       |
| Poly (D,L-lactic-co-glycolide) PLGA (85:15), Mw = 50,000–75,000) was also obtained from Sigma–Aldrich.                                         | Methylene chloride or dichloromethane (DCM)                                                                      | [10]      |
| Low viscosity sodium alginate derived from brown algae (ALV, 250 cps)                                                                          | Water                                                                                                            | [11]      |
| Chitosan (TM <sub>65</sub> CM <sub>50</sub> CS)                                                                                                |                                                                                                                  |           |
| Polycaprolactone (Mn = 84 kDa, PDI 1.53); Poly(ethylene glycol) Mn = 6 kDa and Mn = 35 kDa                                                     | Dichloromethane (DCM); Chloroform                                                                                | [13]      |

|                                                                                                                                                                                              |                                                                                                        |      |
|----------------------------------------------------------------------------------------------------------------------------------------------------------------------------------------------|--------------------------------------------------------------------------------------------------------|------|
| polyvinyl alcohol (PVA)                                                                                                                                                                      | Water                                                                                                  | [15] |
| poly ( $\beta$ -aminoesters) (PBAE)                                                                                                                                                          | HCL; Acetate                                                                                           | [16] |
| Poly(vinylidene fluoride) (PVDF)                                                                                                                                                             | Tetrahydrofuran (THF); N,N-dimethyl formamide (DMF)                                                    | [14] |
| PNIPAAm (N-isopropylacrylamide (NIPAAm) + 2,2'-Azo bis(2-methylpropionitrile) (AIBN))                                                                                                        | Chloroform; Ethanol                                                                                    | [19] |
| polyvinylpyrrolidone (PVP) K30 (molecular weight 58,000)                                                                                                                                     | N, N-dimethylacetamide (DMAc); anhydrous ethanol                                                       | [20] |
| Poly(lactic-co-glycolic acid) (PLGA, molecular weight – 10 kDa)                                                                                                                              | Dichloromethane                                                                                        | [17] |
| Eudragit® RS PO (ERS, Mw = 32 kDa)                                                                                                                                                           | Dichloromethane                                                                                        | [18] |
| Poly(lactic-co-glycolic acid) (PLGA) (50:50 weight ratio between the lactic and glycolic monomers)                                                                                           | 2,2,2-Trifluoroethanol (TFE); dimethyl sulfoxide (DMSO); acetonitrile (ACN)                            | [12] |
| pCA-chitosan; pCA-HT-chitosan                                                                                                                                                                | Lactic acid                                                                                            | [21] |
| Poly(lactic-co-glycolic acid) (PLGA) copolymer (LA/GA: 50/50, Resomer RG503H, Mw = 36 KDa and Resomer RG502H, Mw = 12 KDa)                                                                   | Dimethylformamide (DMF); tetrahydrofuran (THF)                                                         | [22] |
| Poly(lactic-co-glycolic acid) (PLGA 75:25, Mw 66-107 kD, Sigma-Aldrich); Alginate (sodium alginate, 100-300 cP, Sigma-Aldrich)                                                               | 1,1,1,3,3,3- hexafluoroisopropanol (HFIP, Apollo Scientific Ltd., Cheshire, UK); deionised water       | [24] |
| Poly(L-lactide) (PLA)                                                                                                                                                                        | Chloroform; Surfactante triethyl benzyl ammonium chloride (TEBAC, C <sub>13</sub> H <sub>22</sub> CIN) | [23] |
| Poly(lactic-co-glycolic acid) (PLGA); Poly(ethylene glycol) (PEG) with Mn = 35 kDa                                                                                                           | Chloroform, dichloromethane (DCM)                                                                      | [25] |
| PLGA copolymer (LA/GA: 50/50, Resomer RG504H, Mw= 46 KDa) was purchased from Evonik Industries AG (Essen, Germany); Poly(vinyl alcohol) (PVA) Mw=130 KDa was bought from Sigma-Aldrich (USA) | Chloroform; methylene chloride; Acetonitrile;                                                          |      |
| Acetalated Dextran (Ace - DEX)                                                                                                                                                               | Dimethylformamide (DMF); Tetrahydrofuran (THF);                                                        | [26] |
| poly disulfide polyether urethane (PEU)                                                                                                                                                      | Methanol; Ethanol; Polysorbat 80 (Tween 80)                                                            |      |
| polyethylene glycol (PEG)                                                                                                                                                                    | Ethanol/ethyl acetate/n-butanol; Polysorbat 80 (Tween 80)                                              | [27] |
| Graphene oxide (GO)                                                                                                                                                                          | Trifluoroethanol (TFE, 99,9%)                                                                          | [28] |
| Poly(ethylene glycol) monomethyl ether (mPEG, Mn = 2000 Da and 5000 Da), d,l-lactide (PDLA) and $\epsilon$ -caprolactone                                                                     | In water suspension                                                                                    | [29] |
| poly(lactic-co-glycolic acid) (PLGA) (MW = 10000–20000)                                                                                                                                      | Tetrahydrofuran (THF)                                                                                  | [30] |
| 2-methacryloyloxyethyl phosphorylcholine (MPC) (MPC) - MPC polymer (Lipidure®-CM) and amine-modified MPC polymer (Lipidure®-NH01)                                                            | Acetonitrile                                                                                           | [31] |
| 2-methacryloyloxyethyl phosphorylcholine (MPC) (MPC) - MPC polymer (Lipidure®-CM) and amine-modified MPC polymer (Lipidure®-NH01)                                                            | Triethylamine/acetate buffer (pH 8, 0.1 M); Ethanol                                                    | [32] |
| Polyvinylpyrrolidone (PVP)                                                                                                                                                                   | Triethylamine/acetate buffer (pH 8, 0.1 M); Ethanol                                                    | [33] |
| Poly( $\epsilon$ -caprolactone) (PCL) (Mw = 4.5 $\times$ 103 g/mol)                                                                                                                          | Water                                                                                                  | [34] |
| Acetalated Dextran (Ace-DEX)                                                                                                                                                                 | Glacial acetic acid (HAc)                                                                              | [35] |
|                                                                                                                                                                                              | Ethyl acetate:n-butanol:ethanol                                                                        | [36] |

|                                                                                                                                                                                                                                                            |                                                |      |
|------------------------------------------------------------------------------------------------------------------------------------------------------------------------------------------------------------------------------------------------------------|------------------------------------------------|------|
| Alginate sodium salt (Sigma–Aldrich Corp., St. Louis, MO, USA)                                                                                                                                                                                             | Deionized (DI) water                           | [37] |
| chitosan (MW: 120.106 g mol <sup>-1</sup> ; degree of deacetylation 85%), PEG (MW 20.000 g mol <sup>-1</sup> ) and hyaluronic acid 800.000 g mol <sup>-1</sup>                                                                                             | 2% acetic acid in double distilled water (v/v) | [39] |
| Alginate (MW ~ 120 k Da, guluronic to mannuronic ratio of 1.7:1) (polissacarideo); chitosan [viscosity average molecular weight MW <sub>v</sub> ~ 50–190 kDa, degree of deacetylation (DD): 75–85%] and chitosan (MW <sub>v</sub> ~ 310–375 kDa, DD < 75%) | Tistilled water, acetic acid                   | [40] |
| Eudragit L100-55 (MW = 320 000 g mol <sup>-1</sup> )                                                                                                                                                                                                       | Isopropanol                                    | [41] |
| Wheat gluten                                                                                                                                                                                                                                               | Acetic acid, ethanol                           | [42] |

**Table 3.** Charges used in the microparticles and the treatment or objective.

| Charge                                                                                                        | Treatment / objective                                                                                                    | Reference |
|---------------------------------------------------------------------------------------------------------------|--------------------------------------------------------------------------------------------------------------------------|-----------|
| Bovine serum albumin (BSA) and lysozyme                                                                       | Encapsulate bovine serum albumin (BSA) and lysozyme                                                                      | [2]       |
| BSA (Albumin Fraction V from bovine serum, 69 000 Da)                                                         | Charging potential                                                                                                       | [3]       |
| Insulin encapsulation                                                                                         | Selected as a peptide template                                                                                           | [7]       |
| Encapsulation of resiquimod                                                                                   | Treatment of <i>Leishmania donovani</i>                                                                                  | [9]       |
| Encapsulation of 90% of simvastatin                                                                           | Drug release and application in bone tissue engineering                                                                  | [10]      |
| Albumin from chicken egg white (ovalbumin [OVA], Grade V, MW = 44 kDa)                                        | Antigen model to induce immune responses in mice after oral vaccination                                                  | [11]      |
| Metronidazole (MTZ)                                                                                           | Gastric treatment caused by <i>Helicobacter pylori</i>                                                                   | [18]      |
| Metronidazole (MTZ)                                                                                           | Gastric treatment caused by <i>Helicobacter pylori</i>                                                                   | [17]      |
| Ketoprofen (KET)                                                                                              | Drug Release                                                                                                             | [19]      |
| Acyclovir (ACY)                                                                                               | Low water soluble model drug                                                                                             | [20]      |
| Piperine (PIP)                                                                                                | Reduce gastrointestinal irritation (microparticle loaded with PIP)                                                       | [21]      |
| Rifampin                                                                                                      | Model drug                                                                                                               | [23]      |
| Recombinant vascular endothelial growth factor (VEGF), Recombinant human bone morphogenetic protein-7 (BMP-7) | Bone tissue                                                                                                              | [25]      |
| Recombinant protective antigen (rPA)                                                                          | <i>Bacillus Anthracis</i>                                                                                                | [27]      |
| Loaded with doxorubicin (DOX)                                                                                 | Efficiency and release                                                                                                   | [28]      |
| Graphene oxide (GO)                                                                                           | Battery electrodes                                                                                                       | [29]      |
| Doxorubicin (DOX)                                                                                             | An anticancer drug used to demonstrate the approach to the application of encapsulation and delivery of hydrophilic drug | [30]      |
| Artemether                                                                                                    | Produce artemether-loaded PLGA-MPs for enhanced bioavailability in malarial therapy.                                     | [31]      |
| Yeast <i>Saccharomyces cerevisiae</i> Kyokai No. 7                                                            | Encapsulation and culture of living cells in vesicles                                                                    | [33]      |
| Dextran and BSA encapsulation                                                                                 | Release study                                                                                                            | [32]      |

|                                                                                                                                        |                                                                                         |      |
|----------------------------------------------------------------------------------------------------------------------------------------|-----------------------------------------------------------------------------------------|------|
| Murabutide, ovalbumina_(OVA)                                                                                                           | As an adjuvant model or antigen, respectively.                                          | [36] |
| They used 0.945 µm diameter Sera-Mag carboxylate-modified magnetic speed-beads. BT-474 breast cancer cells; BT-474 breast cancer cells | For generation and magnetic microparticles and another for cellular encapsulation model | [37] |
| Caffeine                                                                                                                               | Hydrophilic model compound to evaluate the efficiency of microparticle encapsulation    | [40] |
| Prednisolone                                                                                                                           | Inflammatory bowel disease (IBD) (ulcerative colitis and Crohn's disease)               | [41] |

## References

1. Yao, J.; Kuang Lim, L.; Xie, J.; Hua, J.; Wang, C.-H. Characterization of electrospraying process for polymeric particle fabrication. *J. Aerosol Sci.* **2008**, *39*, 987–1002.
2. Xie, J.; Ng, W.J.; Lee, L.Y.; Wang, C.H. Encapsulation of protein drugs in biodegradable microparticles by co-axial electrospray. *J. Colloid Interface Sci.* **2008**, *317*, 469–476.
3. Suksamran, T.; Opanasopit, P.; Rojanarata, T.; Ngawhirunpat, T.; Ruktanonchai, U.; Supaphol, P. Biodegradable alginate microparticles developed by electrohydrodynamic spraying techniques for oral delivery of protein. *J. Microencapsul.* **2009**, *26*, 563–570.
4. Almería, B.; Deng, W.; Fahmy, T.M.; Gomez, A. Controlling the morphology of electrospray-generated PLGA microparticles for drug delivery. *J. Colloid Interface Sci.* **2010**, *343*, 125–133.
5. Li, X.; MacEwan, M.R.; Xie, J.; Siewe, D.; Yuan, X.; Xia, Y. Fabrication of Density Gradients of Biodegradable Polymer Microparticles and Their Use in Guiding Neurite Outgrowth. *Adv. Funct. Mater.* **2010**, *20*, 1632–1637.
6. Wang, H.; Liu, Q.; Yang, Q.; Li, Y.; Wang, W.; Sun, L.; Zhang, C.; Li, Y. Electrospun poly(methyl methacrylate) nanofibers and microparticles. *J. Mater. Sci.* **2010**, *45*, 1032–1038.
7. Bussano, R.; Chirio, D.; Costa, L.; Turci, F.; Trotta, M. Preparation and Characterization of Insulin-Loaded Lipid-Based Microspheres Generated by Electrospray. *J. Dispers. Sci. Technol.* **2011**, *32*, 1524–1530.
8. Zhang, X.; Zhao, Y. Programmable patterning of polymeric microparticles by floating electrodes-assisted electrospray. *J. Micromechanics Microengineering* **2012**, *22*, 047001.
9. Duong, A.D.; Sharma, S.; Peine, K.J.; Gupta, G.; Satoskar, A.R.; Bachelder, E.M.; Wyslouzil, B.E.; Ainslie, K.M. Electrospray Encapsulation of Toll-Like Receptor Agonist Resiquimod in Polymer Microparticles for the Treatment of Visceral Leishmaniasis. *Mol. Pharm.* **2013**, *10*, 1045–1055.
10. Nath, S.D.; Son, S.; Sadiasa, A.; Min, Y.K.; Lee, B.T. Preparation and characterization of PLGA microspheres by the electrospraying method for delivering simvastatin for bone regeneration. *Int. J. Pharm.* **2013**, *443*, 87–94.
11. Suksamran, T.; Ngawhirunpat, T.; Rojanarata, T.; Sajomsang, W.; Pitaksuteepong, T.; Opanasopit, P. Methylated N-(4-N,N-dimethylaminocinnamyl) chitosan-coated electrospray OVA-loaded microparticles for oral vaccination. *Int. J. Pharm.* **2013**, *448*, 19–27.
12. Almería, B.; Gomez, A. Electrospray synthesis of monodisperse polymer particles in a broad (60nm–2µm) diameter range: guiding principles and formulation recipes. *J. Colloid Interface Sci.* **2014**, *417*, 121–130.
13. Bock, N.; Dargaville, T.R.; Woodruff, M.A. Controlling microencapsulation and release of micronized proteins using poly(ethylene glycol) and electrospraying. *Eur. J. Pharm. Biopharm.* **2014**, *87*, 366–377.
14. Correia, D.M.; Gonçalves, R.; Ribeiro, C.; Sencadas, V.; Botelho, G.; Ribelles, J.L.G.; Lanceros-Méndez, S. Electrospayed poly(vinylidene fluoride) microparticles for tissue engineering applications. *RSC Adv.* **2014**, *4*, 33013–33021.
15. Duong, A.D.; Ruan, G.; Mahajan, K.; Winter, J.O.; Wyslouzil, B.E. Scalable, Semicontinuous Production of Micelles Encapsulating Nanoparticles via Electrospray. *Langmuir* **2014**, *30*, 3939–3948.

16. Funasaki, Y.; Tsuchiya, E.; Maruyama, T. Hollow giant lipid vesicles prepared by coaxially electrospraying solutions of phospholipid and degradable polyelectrolyte. *Colloid Polym. Sci.* **2014**, *292*, 3049–3053.
17. Hao, S.; Wang, Y.; Wang, B.; Deng, J.; Zhu, L.; Cao, Y. Formulation of porous poly(lactic-co-glycolic acid) microparticles by electrospray deposition method for controlled drug release. *Mater. Sci. Eng. C* **2014**, *39*, 113–119.
18. Hao, S.; Wang, Y.; Wang, B.; Zou, Q.; Zeng, H.; Chen, X.; Liu, X.; Liu, J.; Yu, S. A novel gastroretentive porous microparticle for anti-Helicobacter pylori therapy: Preparation, in vitro and in vivo evaluation. *Int. J. Pharm.* **2014**, *463*, 10–21.
19. Jin, C.; Li, H.; Williams, G.R.; Wei, R.; Nie, H.; Quan, J.; Zhu, L. Self-assembled liposomes from electrosprayed polymer-based microparticles. *Colloid Polym. Sci.* **2014**, *292*, 2325–2334.
20. Liu, Z.-P.; Cui, L.; Yu, D.-G.; Zhao, Z.-X.; Chen, L. Electrosprayed core&ndash;shell solid dispersions of acyclovir fabricated using an epoxy-coated concentric spray head. *Int. J. Nanomedicine* **2014**, *9*, 1967.
21. Pengpong, T.; Sangvanich, P.; Sirilertmukul, K.; Muangsin, N. Design, synthesis and in vitro evaluation of mucoadhesive p-coumarate-thiolated-chitosan as a hydrophobic drug carriers. *Eur. J. Pharm. Biopharm.* **2014**, *86*, 487–497.
22. Jafari-Nodoushan, M.; Barzin, J.; Mobedi, H. Size and morphology controlling of PLGA microparticles produced by electro hydrodynamic atomization. *Polym. Adv. Technol.* **2015**, *26*, 502–513.
23. Lu, J.; Hou, R.; Yang, Z.; Tang, Z. Development and characterization of drug-loaded biodegradable PLA microcarriers prepared by the electrospraying technique. *Int. J. Mol. Med.* **2015**, *36*, 249–254.
24. Mouthuy, P.-A.; Groszkowski, L.; Ye, H. Performances of a portable electrospinning apparatus. *Biotechnol. Lett.* **2015**, *37*, 1107–1116.
25. Bock, N.; Dargaville, T.R.; Kirby, G.T.S.; Hutmacher, D.W.; Woodruff, M.A. Growth Factor-Loaded Microparticles for Tissue Engineering: The Discrepancies of In Vitro Characterization Assays. *Tissue Eng. Part C Methods* **2016**, *22*, 142–154.
26. Faramarzi, A.R.; Barzin, J.; Mobedi, H. Effect of solution and apparatus parameters on the morphology and size of electrosprayed PLGA microparticles. *Fibers Polym.* **2016**, *17*, 1806–1819.
27. Gallovic, M.D.; Schully, K.L.; Bell, M.G.; Elberson, M.A.; Palmer, J.R.; Darko, C.A.; Bachelder, E.M.; Wyslouzil, B.E.; Keane-Myers, A.M.; Ainslie, K.M. Acetalated Dextran Microparticulate Vaccine Formulated via Coaxial Electrospray Preserves Toxin Neutralization and Enhances Murine Survival Following Inhalational Bacillus Anthracis Exposure. *Adv. Healthc. Mater.* **2016**, *5*, 2617–2627.
28. Dai, H.-F.; Chen, J.-M.; Wang, L.-Q. Preparation of stimuli responsive nanoparticles using coaxial electrospray template removal method and its application as drug delivery system. *Acta Polym. Sin.* **2017**, 1947–1954.
29. Fei, L.; Yoo, S.H.; Villamayor, R.A.R.; Williams, B.P.; Gong, S.Y.; Park, S.; Shin, K.; Joo, Y.L. Graphene Oxide Involved Air-Controlled Electrospray for Uniform, Fast, Instantly Dry, and Binder-Free Electrode Fabrication. *ACS Appl. Mater. Interfaces* **2017**, *9*, 9738–9746.
30. Li, W.; Liu, S.; Yao, H.; Liao, G.; Si, Z.; Gong, X.; Ren, L.; Wang, L. Microparticle templating as a route to nanoscale polymer vesicles with controlled size distribution for anticancer drug delivery. *J. Colloid Interface Sci.* **2017**, *508*, 145–153.
31. Mangrio, F.A.; Dwivedi, P.; Han, S.; Zhao, G.; Gao, D.; Si, T.; Xu, R.X. Characteristics of Artemether-Loaded Poly(lactic-co-glycolic) Acid Microparticles Fabricated by Coaxial Electrospray: Validation of Enhanced Encapsulation Efficiency and Bioavailability. *Mol. Pharm.* **2017**, *14*, 4725–4733.
32. Matsuura, T.; Maruyama, T. Calcium phosphate-polymer hybrid microparticles having functionalized surfaces prepared by a coaxially electrospray technique. *Colloids Surfaces A Physicochem. Eng. Asp.* **2017**, *526*, 64–69.
33. Matsuura, T.; Maruyama, T. Hollow phosphorylcholine polymer vesicles prepared by a coaxial electrospray technique. *Colloid Polym. Sci.* **2017**, *295*, 1251–1256.
34. Sander, S.; Tischler, C.; Achelis, L.; Henein, H.; Fritsching, U. Production of polymer microparticles by electrospray atomization. *At. Sprays* **2017**, *27*, 457–464.



35. Zhang, C.; Yao, Z.-C.; Ding, Q.; Choi, J.J.; Ahmad, Z.; Chang, M.-W.; Li, J.-S. Tri-Needle Coaxial Electrospray Engineering of Magnetic Polymer Yolk–Shell Particles Possessing Dual-Imaging Modality, Multiagent Compartments, and Trigger Release Potential. *ACS Appl. Mater. Interfaces* **2017**, *9*, 21485–21495.
36. Chen, N.; Johnson, M.M.; Collier, M.A.; Gallovic, M.D.; Bachelder, E.M.; Ainslie, K.M. Tunable degradation of acetalated dextran microparticles enables controlled vaccine adjuvant and antigen delivery to modulate adaptive immune responses. *J. Control. Release* **2018**, *273*, 147–159.
37. Jeyhani, M.; Mak, S.Y.; Sammut, S.; Shum, H.C.; Hwang, D.K.; Tsai, S.S.H. Controlled Electrospray Generation of Nonspherical Alginate Microparticles. *ChemPhysChem* **2018**, *19*, 2113–2118.
38. Lee, H.; An, S.; Kim, S.; Jeon, B.; Kim, M.; Kim, I.S. Readily Functionalizable and Stabilizable Polymeric Particles with Controlled Size and Morphology by Electrospray. *Sci. Rep.* **2018**, *8*, 1–10.
39. Mutlu, E.C.; Fikai, A.; Fikai, D.; Yildirim, A.B.; Yildirim, M.; Oktar, F.N.; Demir, A. Chitosan/poly(ethylene glycol)/hyaluronic acid biocompatible patches obtained by electrospinning. *Biomed. Mater.* **2018**, *13*, 055011.
40. Nikoo, A.M.; Kadkhodae, R.; Ghorani, B.; Razaq, H.; Tucker, N. Electrospray-assisted encapsulation of caffeine in alginate microhydrogels. *Int. J. Biol. Macromol.* **2018**, *116*, 208–216.
41. Shams, T.; Illangakoon, U.E.; Parhizkar, M.; Harker, A.H.; Edirisinghe, S.; Orlu, M.; Edirisinghe, M. Electrospayed microparticles for intestinal delivery of prednisolone. *J. R. Soc. Interface* **2018**, *15*.
42. Tapia-Hernández, J.A.; Rodríguez-Félix, D.E.; Plascencia-Jatomea, M.; Rascón-Chu, A.; López-Ahumada, G.A.; Ruiz-Cruz, S.; Barreras-Urbina, C.G.; Rodríguez-Félix, F. Porous wheat gluten microparticles obtained by electrospray: Preparation and characterization. *Adv. Polym. Technol.* **2018**, *37*, 2314–2324.
